# Supplementary material
Source: publisher figshare collection journal article supplement (https://acs.figshare.com/ndownloader/files/7874182)
Supplement: Supplementary file 1 [file 7874182]

**Supporting Information**

**for**

**An Enhanced Electrocatalytic Activity of Carbon-Supported  
Ordered Intermetallic Palladium-Lead (Pd<sub>3</sub>Pb) Nanoparticles  
towards Electrooxidation of Formic Acid**

**Takao Gunji,\* Seung Hyo Noh, Toyokazu Tanabe, Chiao Yin Nien,  
Takeo Ohsaka and Futoshi Matsumoto\***

**Supporting Figures**

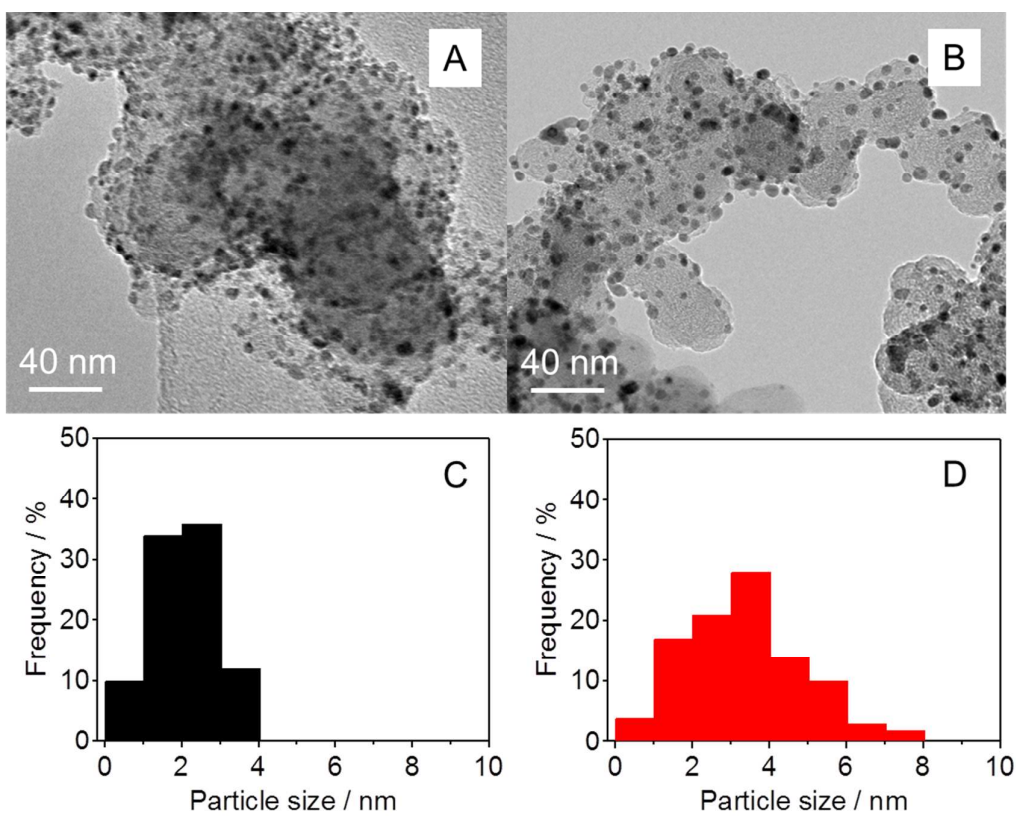

Figure S1 TEM images of the commercially available (A) Pd NPs/CB (20 wt.%) and (B) as-prepared ordered intermetallic Pd<sub>3</sub>Pb NPs/CB. The size distribution of the (C) Pd NPs/CB and (D) Pd<sub>3</sub>Pb NPs/CB is shown in the histograms.

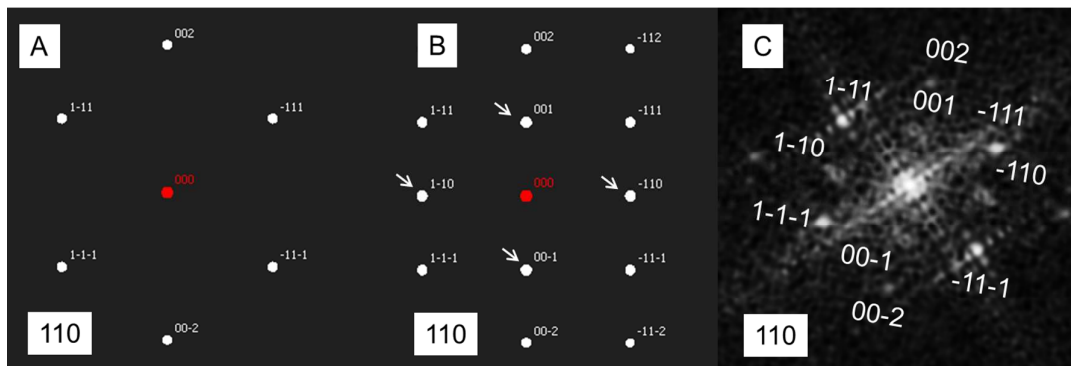

Figure S2. The simulated FFT profiles of (A) fcc (atomically disordered) and (B)  $\text{Cu}_3\text{Au}$  (ordered intermetallic phase) type structures from 110 zone. (C) The FFT pattern obtained for ordered intermetallic  $\text{Pd}_3\text{Pb}$  NP (see Figure 2B inset of the main text).

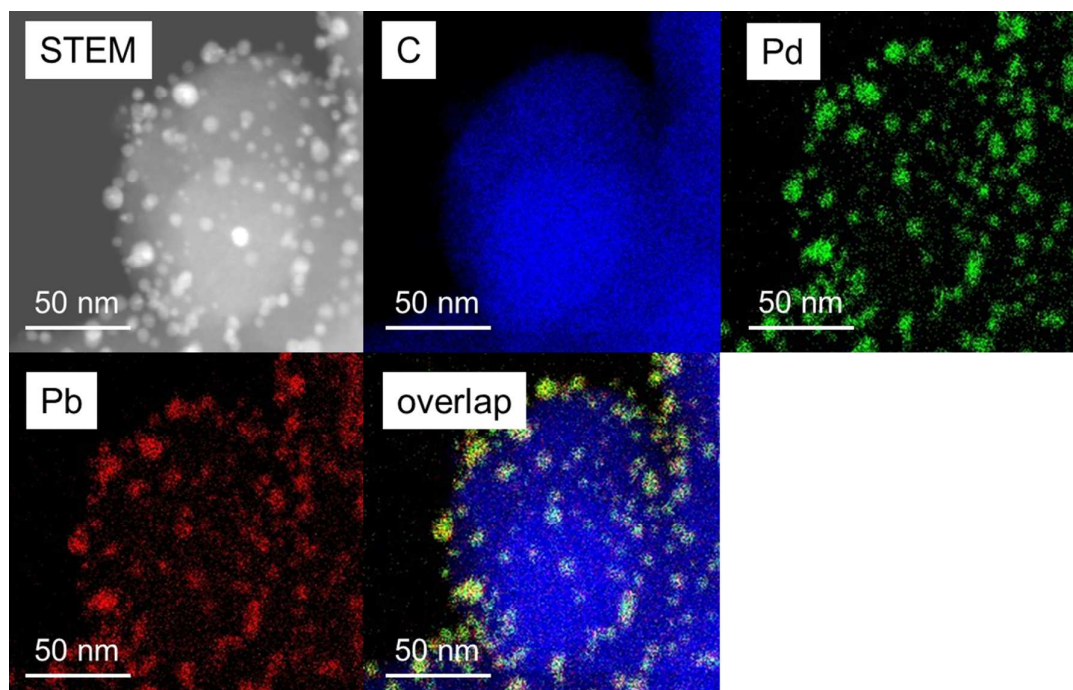

Figure S3. Overview of HAADF-STEM image of Pd<sub>3</sub>Pb NPs/CB and the corresponding mapping images.

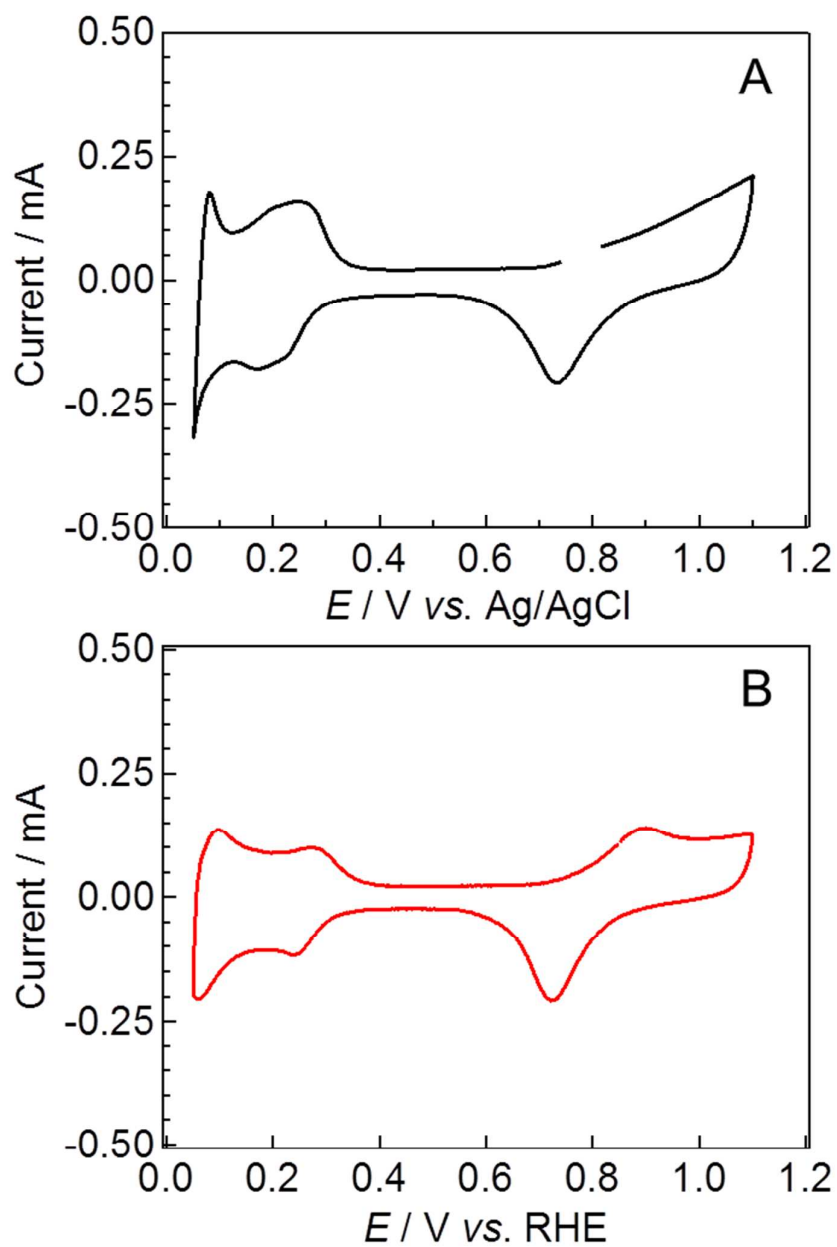

Figure S4. Cyclic voltammograms obtained for the commercially available (A) Pd NPs/CB and (B) Pd<sub>3</sub>Pb NPs/CB after the 50 cycles' electrochemical treatment at a rate of 20 mVs<sup>-1</sup> between 0.05 and 1.1 V in a N<sub>2</sub>-saturated 0.1 M HClO<sub>4</sub> aqueous solution.

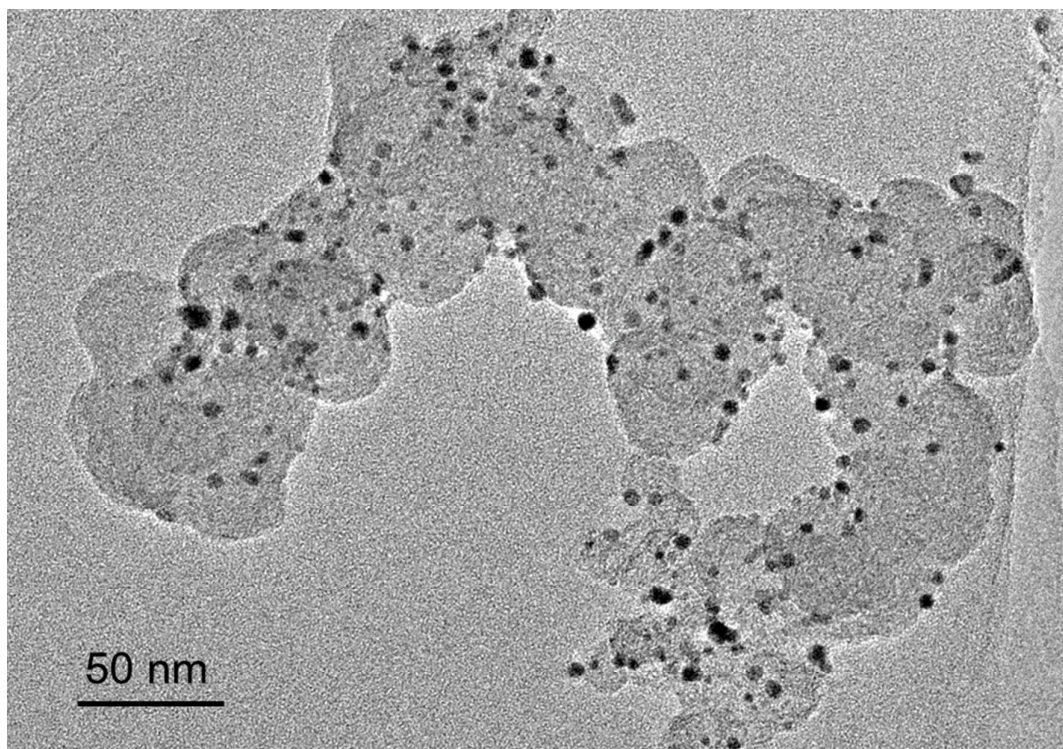

Figure S5. TEM image of prepared Pd@Pd<sub>3</sub>Pb NPs/CB.

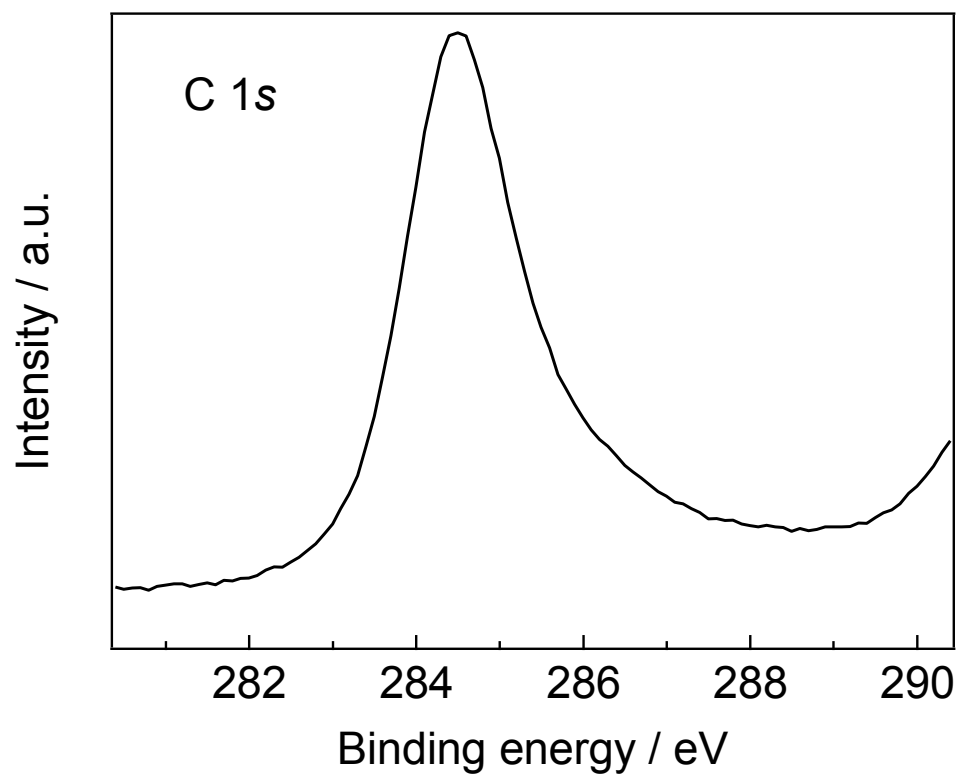

Figure S6. XPS profile in the C 1s region.

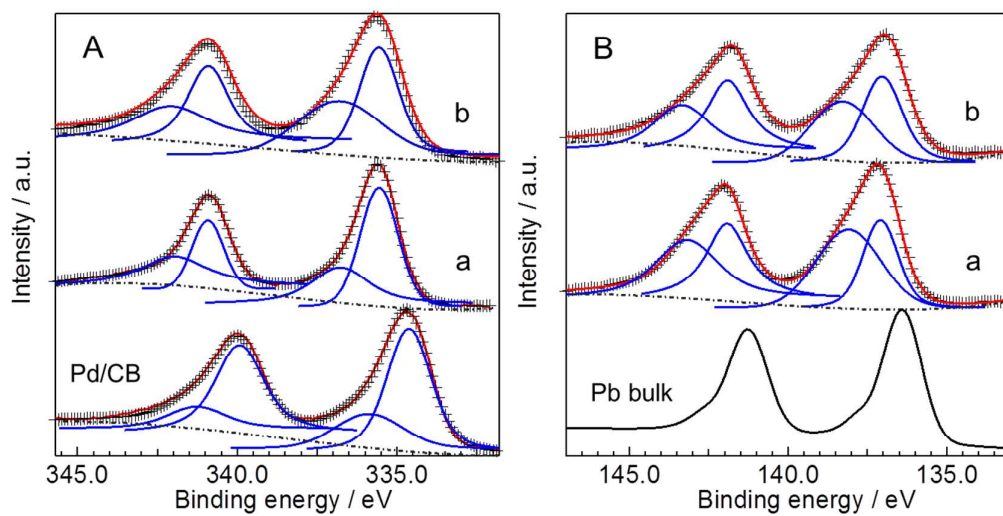

Figure S7. XPS profiles in the (A) Pd 3d and (B) Pb 4f regions for (a) as-prepared Pd<sub>3</sub>Pb NPs/CB and (b) after Ar<sup>+</sup> etching for 1 s.



Table S1. Summarized XPS analysis

| Entry                                                                  | Position (Pd <sup>0</sup> ) / eV | Position (Pb <sup>0</sup> ) / eV | Atomic ratio of Pd and Pb / Pd : Pb |
|------------------------------------------------------------------------|----------------------------------|----------------------------------|-------------------------------------|
| Pd NPs/CB                                                              | 334.63                           | –                                | –                                   |
| Pb bulk                                                                | –                                | 136.4                            | –                                   |
| As-prepared Pd <sub>3</sub> Pb NPs/CB                                  | 335.12                           | 137.05                           | 60.5 : 39.5                         |
| Pre-treated Pd <sub>3</sub> Pb NPs/CB <sup>a)</sup>                    | 335.41                           | 137.04                           | 15.0 : 85.0                         |
| After Ar <sup>+</sup> -etching Pd <sub>3</sub> Pb NPs/CB <sup>b)</sup> | 335.47                           | 136.98                           | 20.1 : 79.9                         |

a) The potential was scanned at 100 mV s<sup>-1</sup> 50 times between 0.05 and 1.1 V vs. RHE in 0.1 M HClO<sub>4</sub>.

b) Ar<sup>+</sup>-etching was performed at 0.5 Pa and 30 W for 10 s.

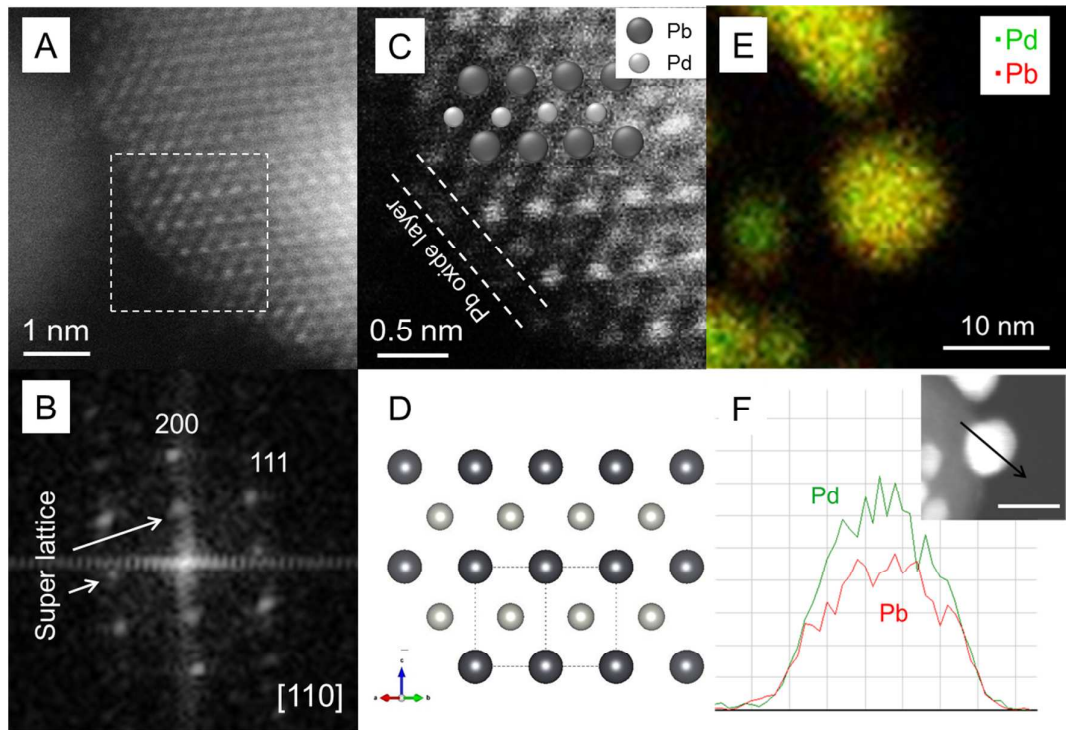

Figure S8 (A) Atomic resolution HAADF-STEM image of the as-prepared  $\text{Pd}_3\text{Pb}$  NP. (B) FFT pattern and (C) image expansion corresponding to the area outlined by the dot square in the image of (A). (D) Crystal structure of ordered intermetallic  $\text{Pd}_3\text{Pb}$  at  $[110]$  zone. (E) STEM-EDS mapping profile image and (F) line profile. Scale bars are 10 nm.

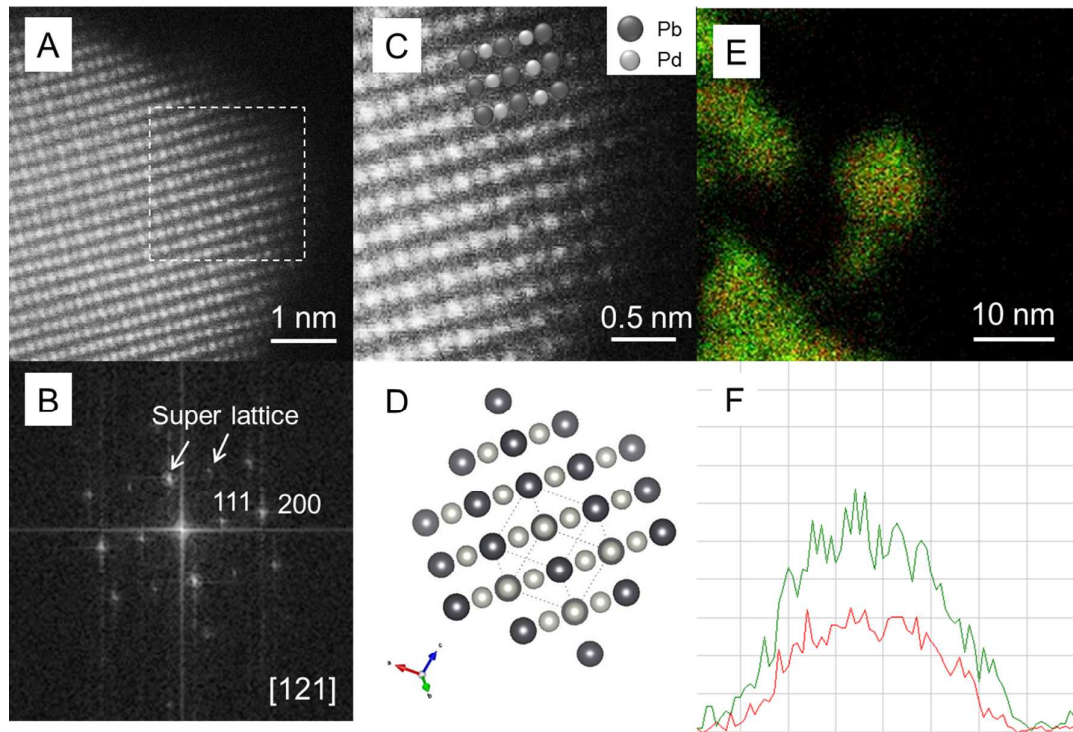

Figure S9 (A) Atomic resolution HAADF-STEM image of the electrochemically 50 cycles-treated Pd<sub>3</sub>Pb NP. (B) FFT pattern and (C) image expansion corresponding to the area outlined by the dot square in the image of (A). (D) Crystal structure of ordered intermetallic Pd<sub>3</sub>Pb at [121] zone. (E) STEM-EDS mapping profile image and (F) line profile. Scale bars are 10 nm.

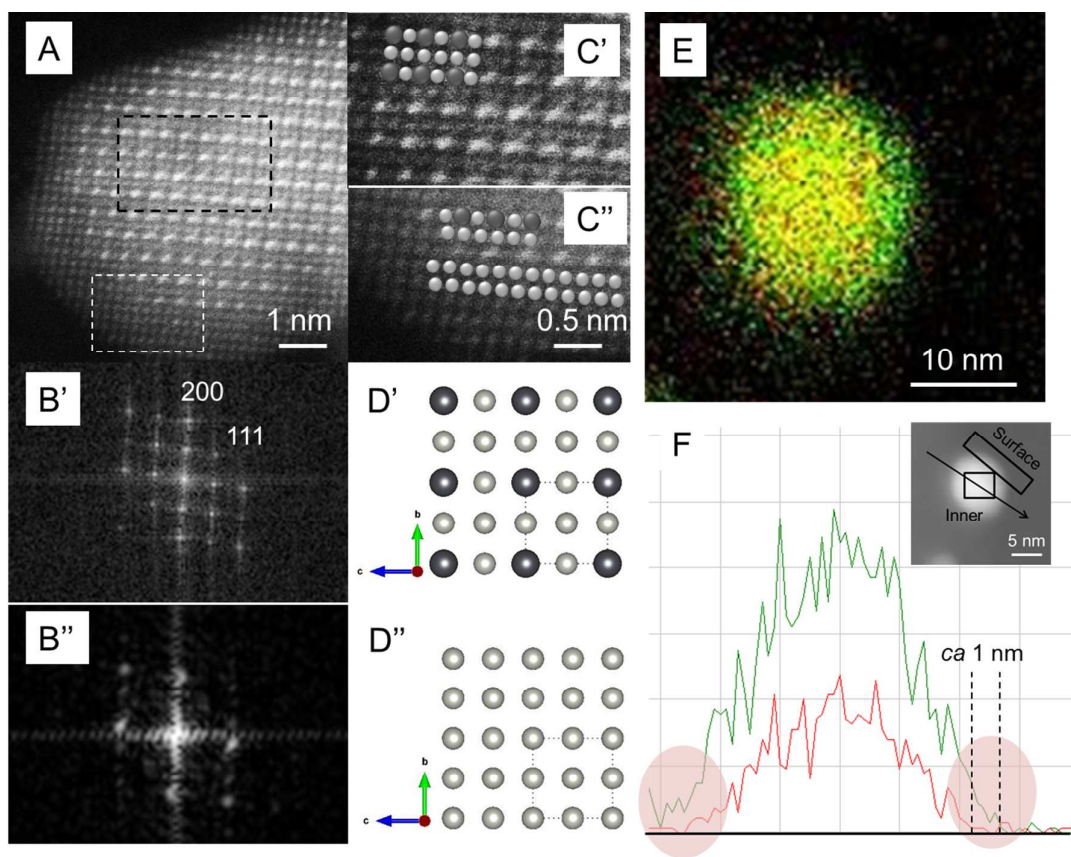

Figure S10 (A) Atomic resolution HAADF-STEM image the electrochemically 100 cycles-treated  $\text{Pd}_3\text{Pb}$  NP. (B) FFT pattern and (C) image expansion corresponding to the area outlined by the dot square in the image of (A). (D) Crystal structure of ordered intermetallic  $\text{Pd}_3\text{Pb}$  at  $[100]$  zone. (E) STEM-EDS mapping profile image and (F) line profile. The ' and '' in B, C and D indicate the inner and surface region, respectively.

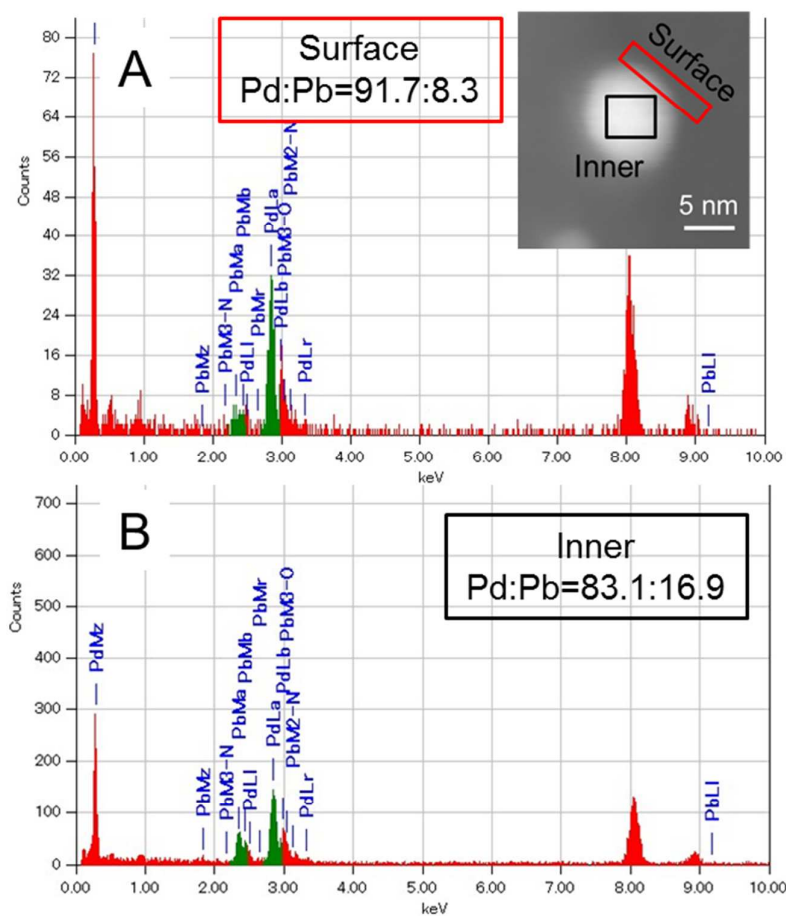

Figure S11. EDS profiles in the (A) surface and (B) inner regions of electrochemically treated ordered intermetallic Pd<sub>3</sub>Pb NPs/CB. Inset : STEM image of the Pd<sub>3</sub>Pb NPs.

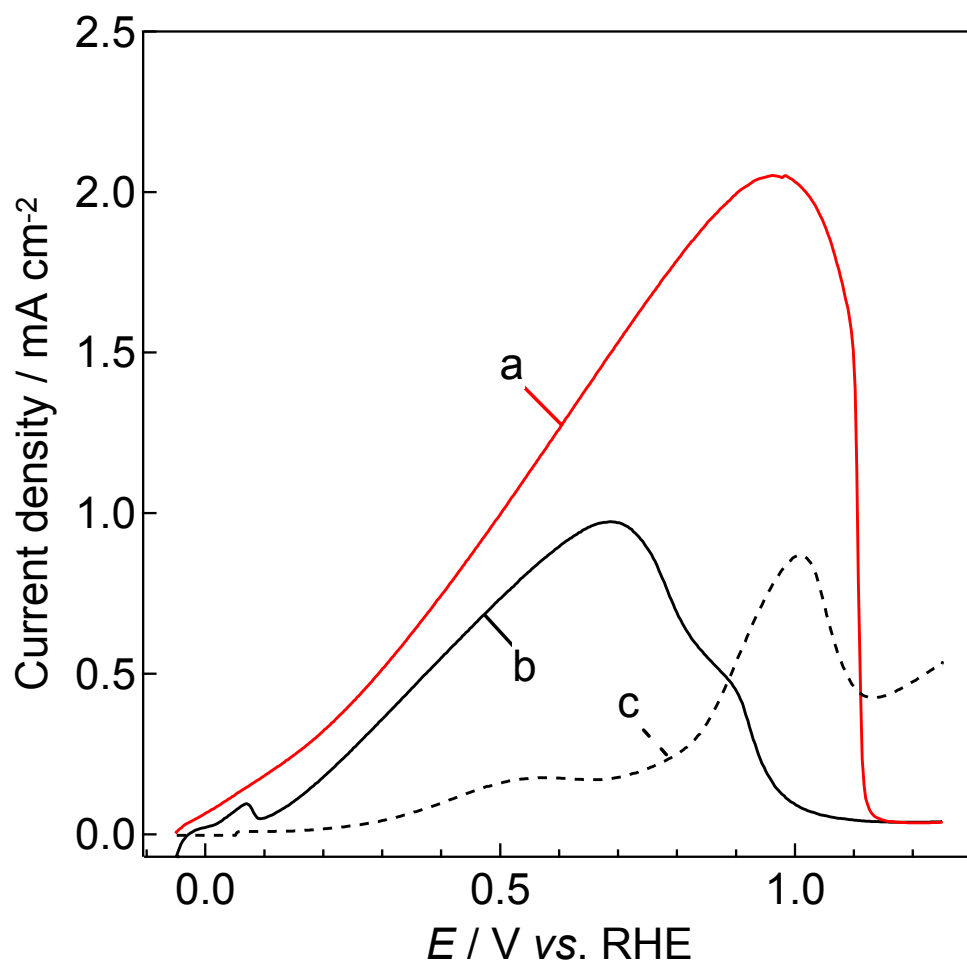

Figure S12 Anodic sweep voltammograms for FA oxidation over (a) electrochemically treated  $\text{Pd}_3\text{Pb}$  NPs/CB, (b) Pd NPs/CB and (c) Pt NPs/CB at  $20 \text{ mV s}^{-1}$  in  $0.1 \text{ M HClO}_4$  +  $0.5 \text{ M FA}$ .

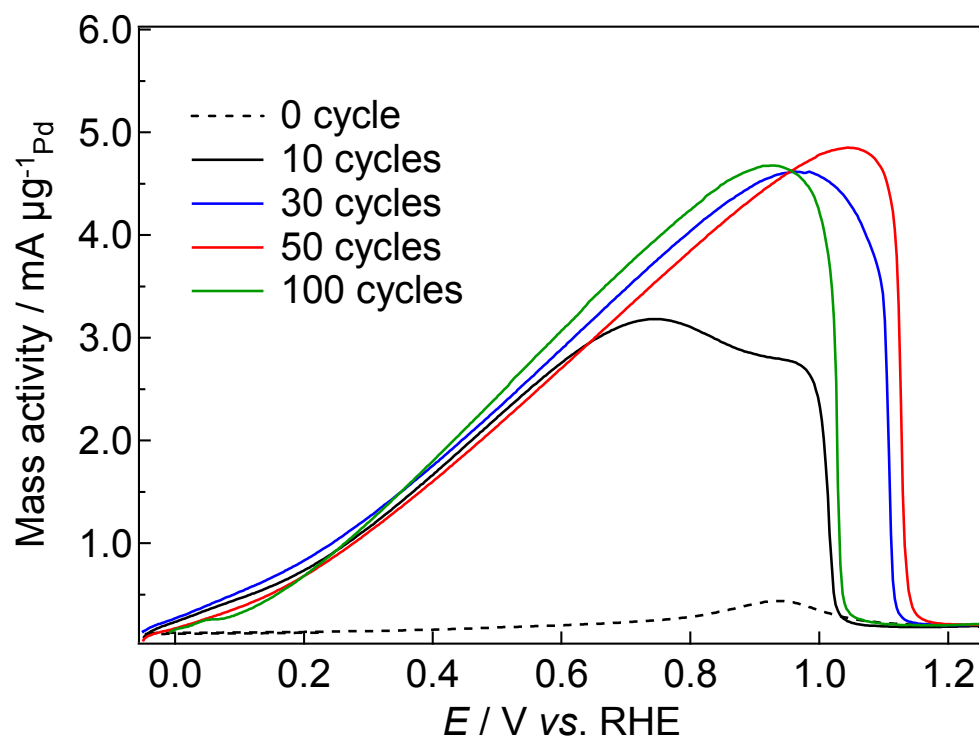

Figure S13 Electrochemical oxidation of FA over ordered intermetallic Pd<sub>3</sub>Pb NPs/CB at 20 mV s<sup>-1</sup> in 0.1 M HClO<sub>4</sub> + 0.5 M FA, depending on the number of potential scan in the electrochemical treatment each cycle.

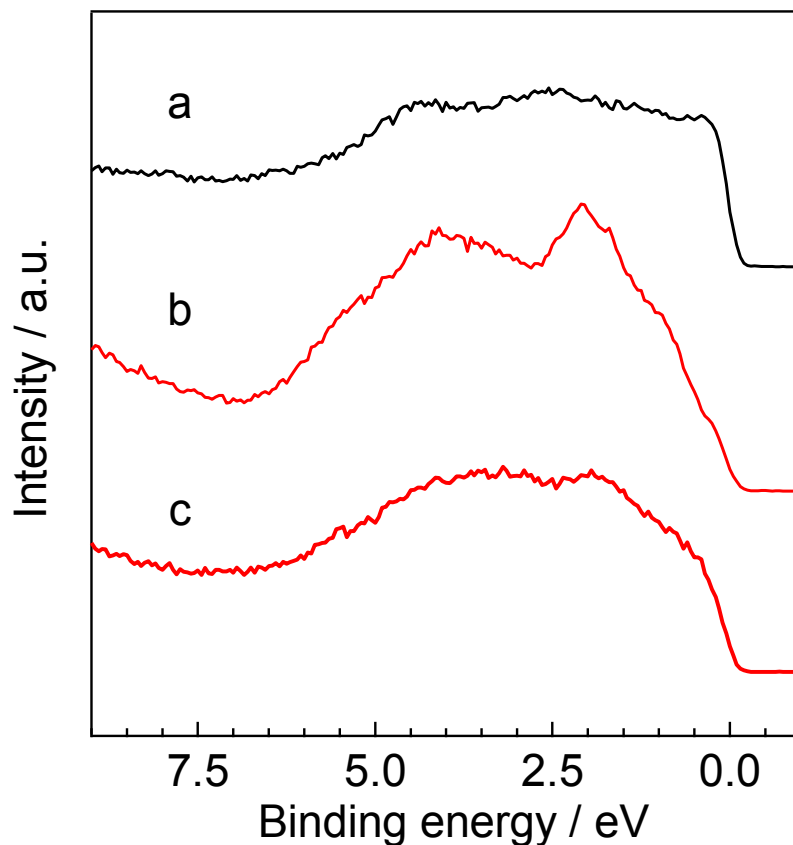

Figure S14 HAXPES profiles in the valence band region for (a) commercially available Pd NPs/CB, (b) as-prepared ordered intermetallic Pd<sub>3</sub>Pb NPs/CB and (c) electrochemically treated ordered intermetallic Pd<sub>3</sub>Pb NPs/CB.

*d – band center*

$$= \int_{-6 \text{ eV}}^{0 \text{ eV}} (\text{Binding Energy}(E) \times \text{Intensity}(E)) dE \Big/ \int_{-6 \text{ eV}}^{0 \text{ eV} (E_f)} \text{Intensity}(E) dE$$
